# Supplementary material for: Genome-wide distribution of histone trimethylation reveals a global impact of bisphenol A on telomeric binding proteins and histone acetyltransferase factors: a pilot study with human and in vitro data
Source: PubMed Central journal article supplement (PMC9793539; doi:10.1186/s13148-022-01408-2), 2022-12-26
Supplement: 13148_2022_1408_MOESM1_ESM.pdf [file 13148_2022_1408_MOESM1_ESM.pdf]

Shereen Cynthia D'Cruz\*<sup>1</sup>, Chunxiang Hao\*<sup>2</sup>, Martin Labussiere<sup>1</sup>, Vicente Mustieles<sup>3,4,5</sup>,  
Carmen Freire<sup>3,4,5</sup>, Louis Legoff<sup>1</sup>, Laura Magnaghi-Jaulin<sup>1</sup>, Alicia Olivas-Martinez<sup>3,4</sup>,  
Andrea Rodriguez-Carrillo<sup>3,4</sup>, Christian Jaulin<sup>1</sup>, Arthur David<sup>1</sup>, Mariana F. Fernandez<sup>3,4,5</sup>≠  
and Fatima Smagulova<sup>1</sup>≠

1 Univ. Rennes, EHESP, Inserm, Irset (Institut de recherche en santé, environnement et travail) - UMR\_S 1085, F-35000, Rennes, France

2 School of Medicine, Linyi University, Linyi 276000, China

3 Center for Biomedical Research (CIBM) & Department of Radiology and Physical Medicine, School of Medicine, University of Granada, 18016, Granada, Spain

4 Instituto de Investigación Biosanitaria (ibs.GRANADA), 18012 Granada, Spain

5 Consortium for Biomedical Research in Epidemiology & Public Health (CIBERESP), 28029 Madrid, Spain

\* equal contribution

**Genome-wide distribution of histone trimethylation reveals a global impact of bisphenol A on telomeric binding proteins and histone acetyltransferase factors: A pilot study with human and *in vitro* data.**

Supplementary information

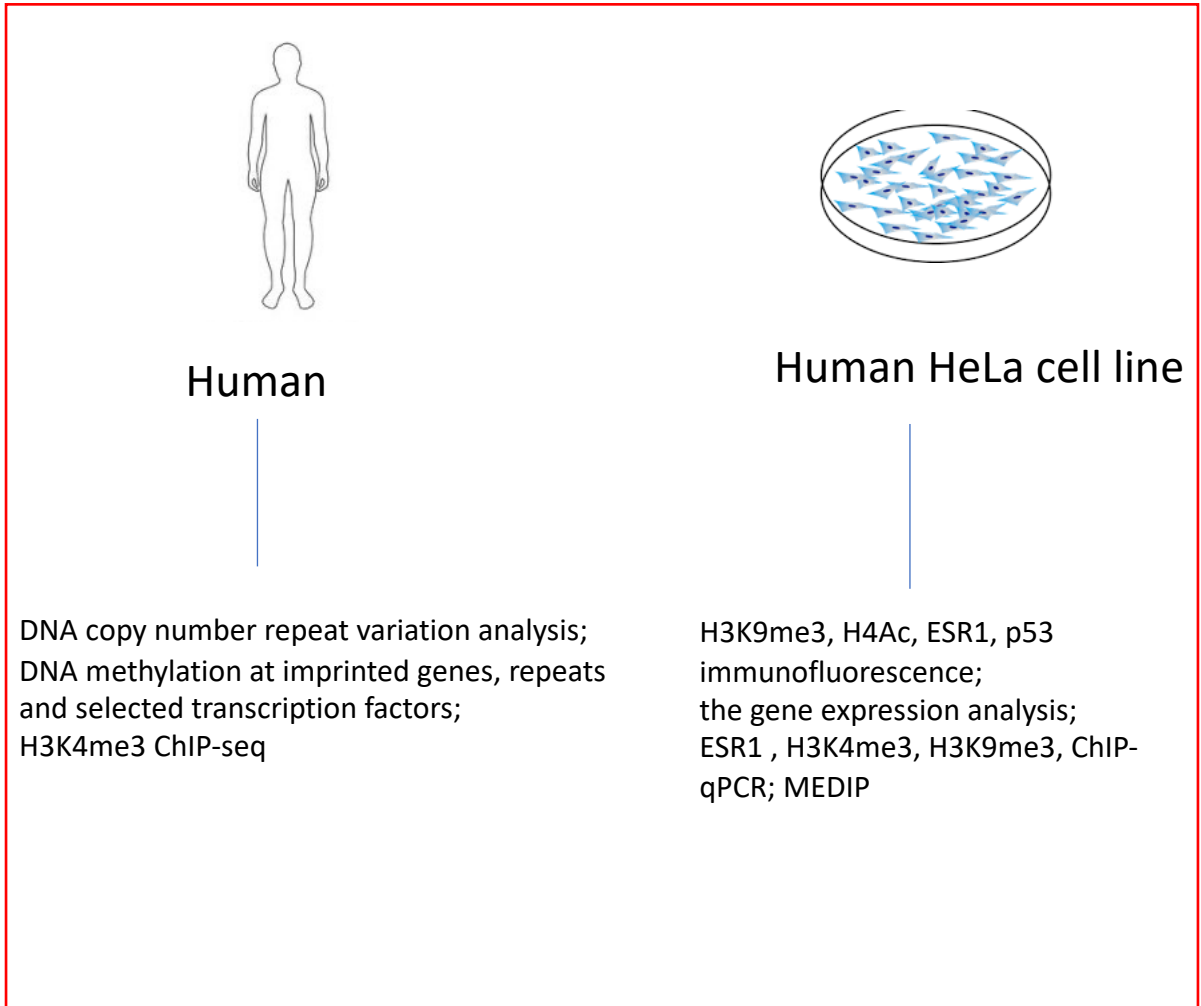

**Figure S1.** Schematic presentation of the experiments performed in this study in human samples and HeLa cells.

A

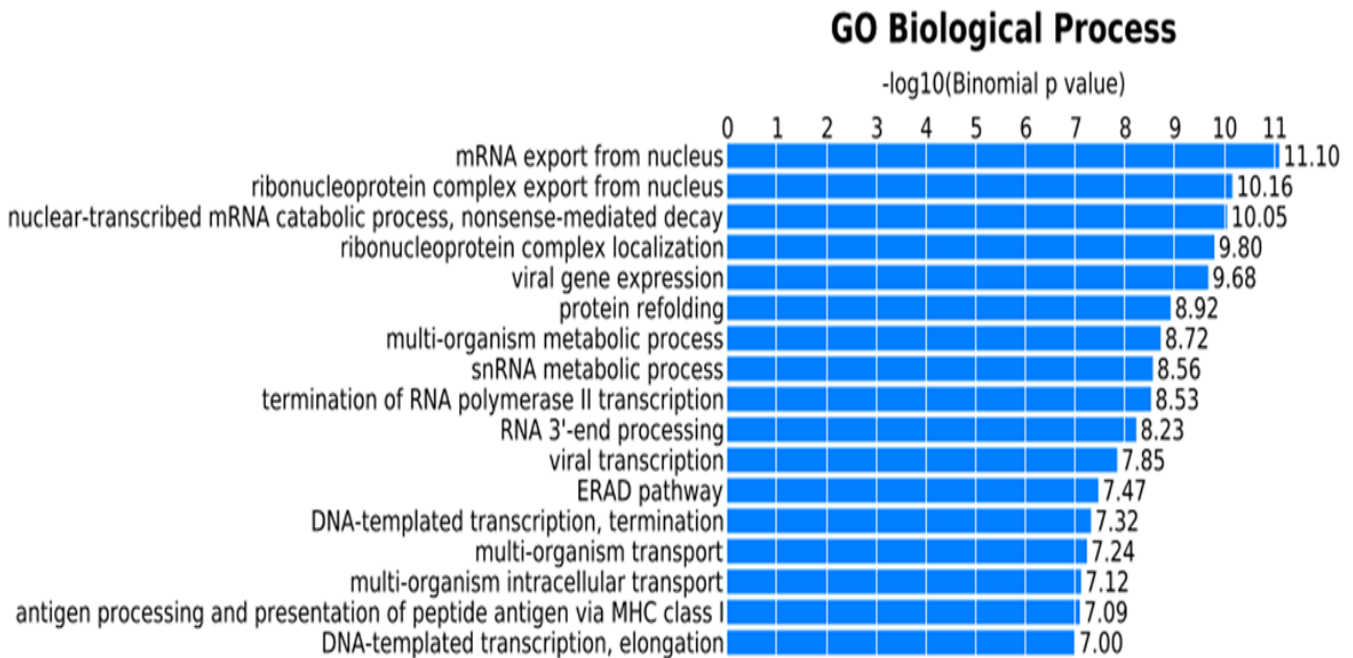

B

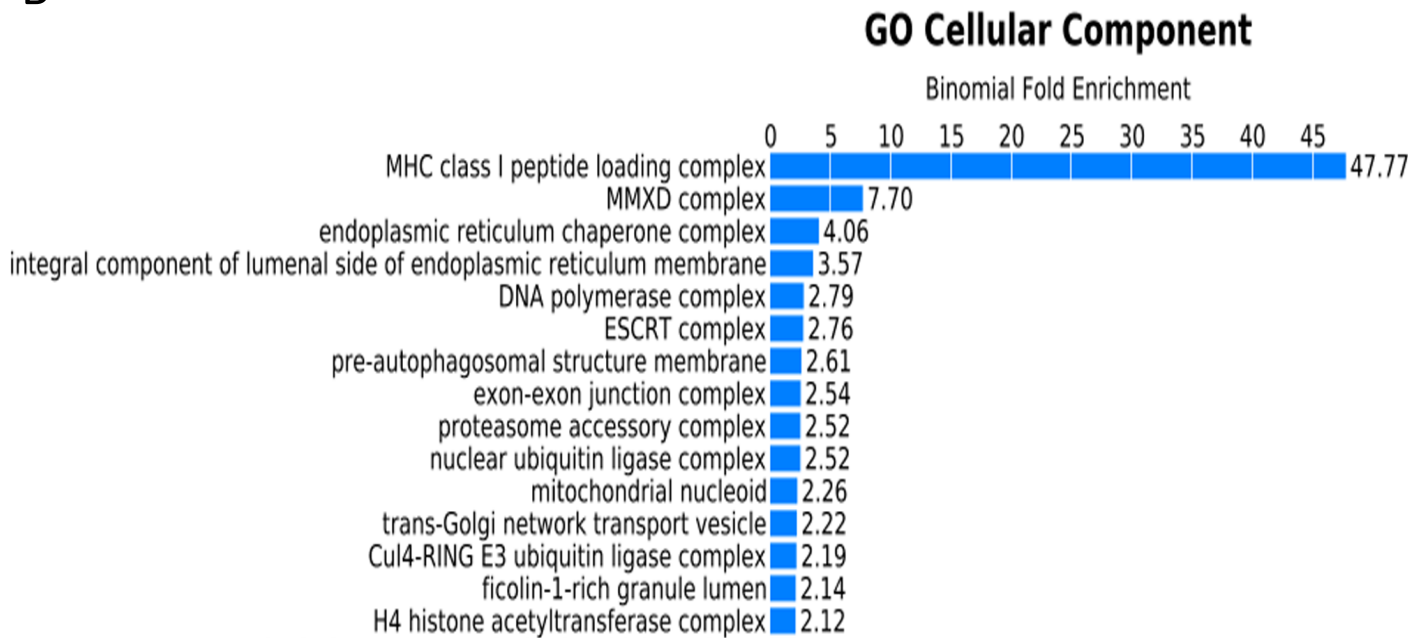

**Figure S2.** Gene Ontology generated by GREAT. A) Gene Ontology “Biological process”, B) Gene Ontology “Cellular component”.

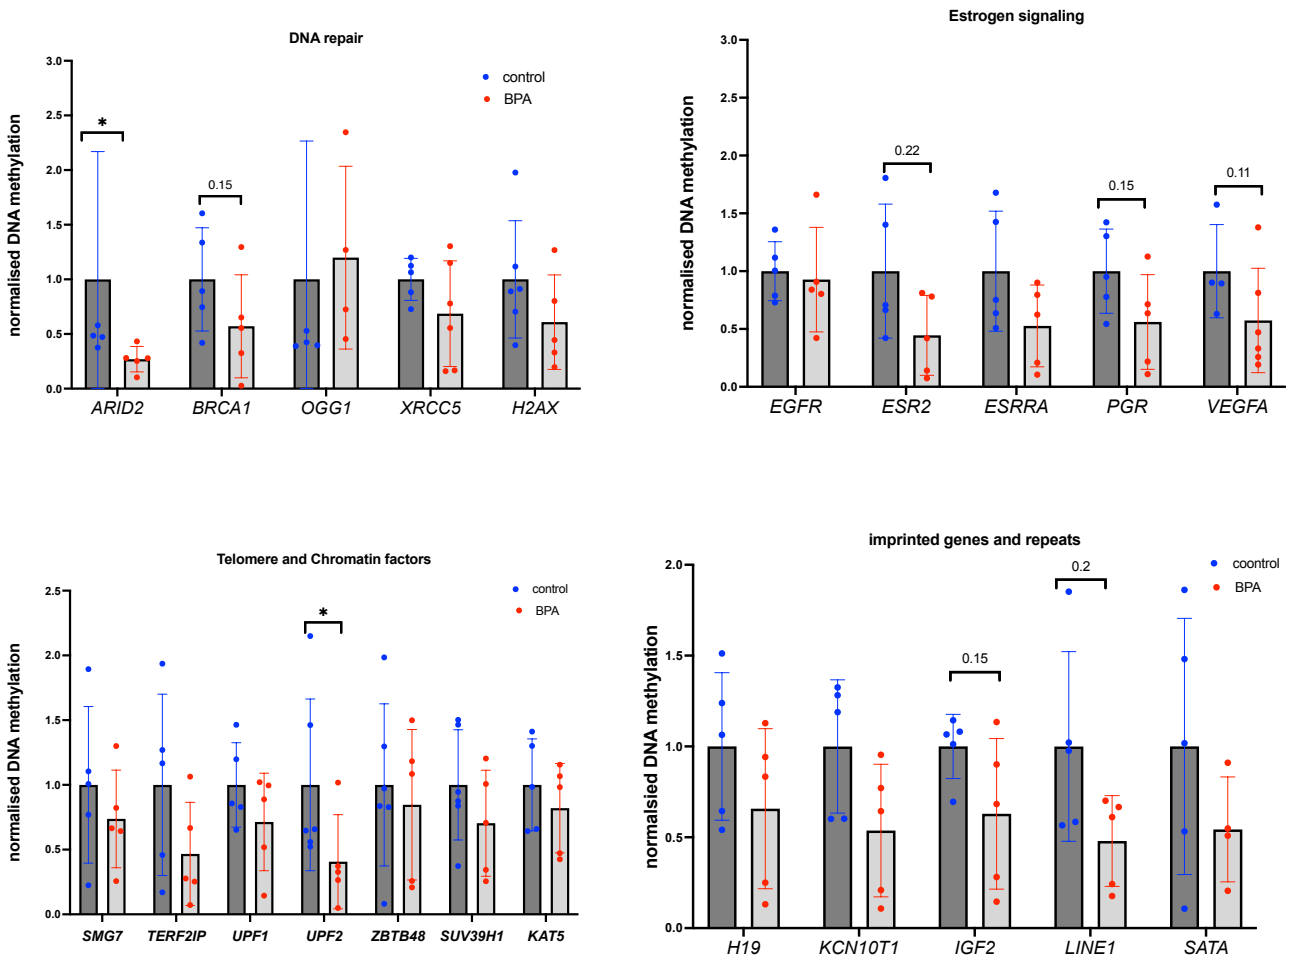

**Figure S3.** DNA methylation analysis at the promoters: A) DNA repair genes, B) oestrogen signalling pathway genes, C) telomere maintenance and chromatin factors genes D) of imprinted genes and repeat regions. \* $p < 0.05$ , Mann–Whitney test.

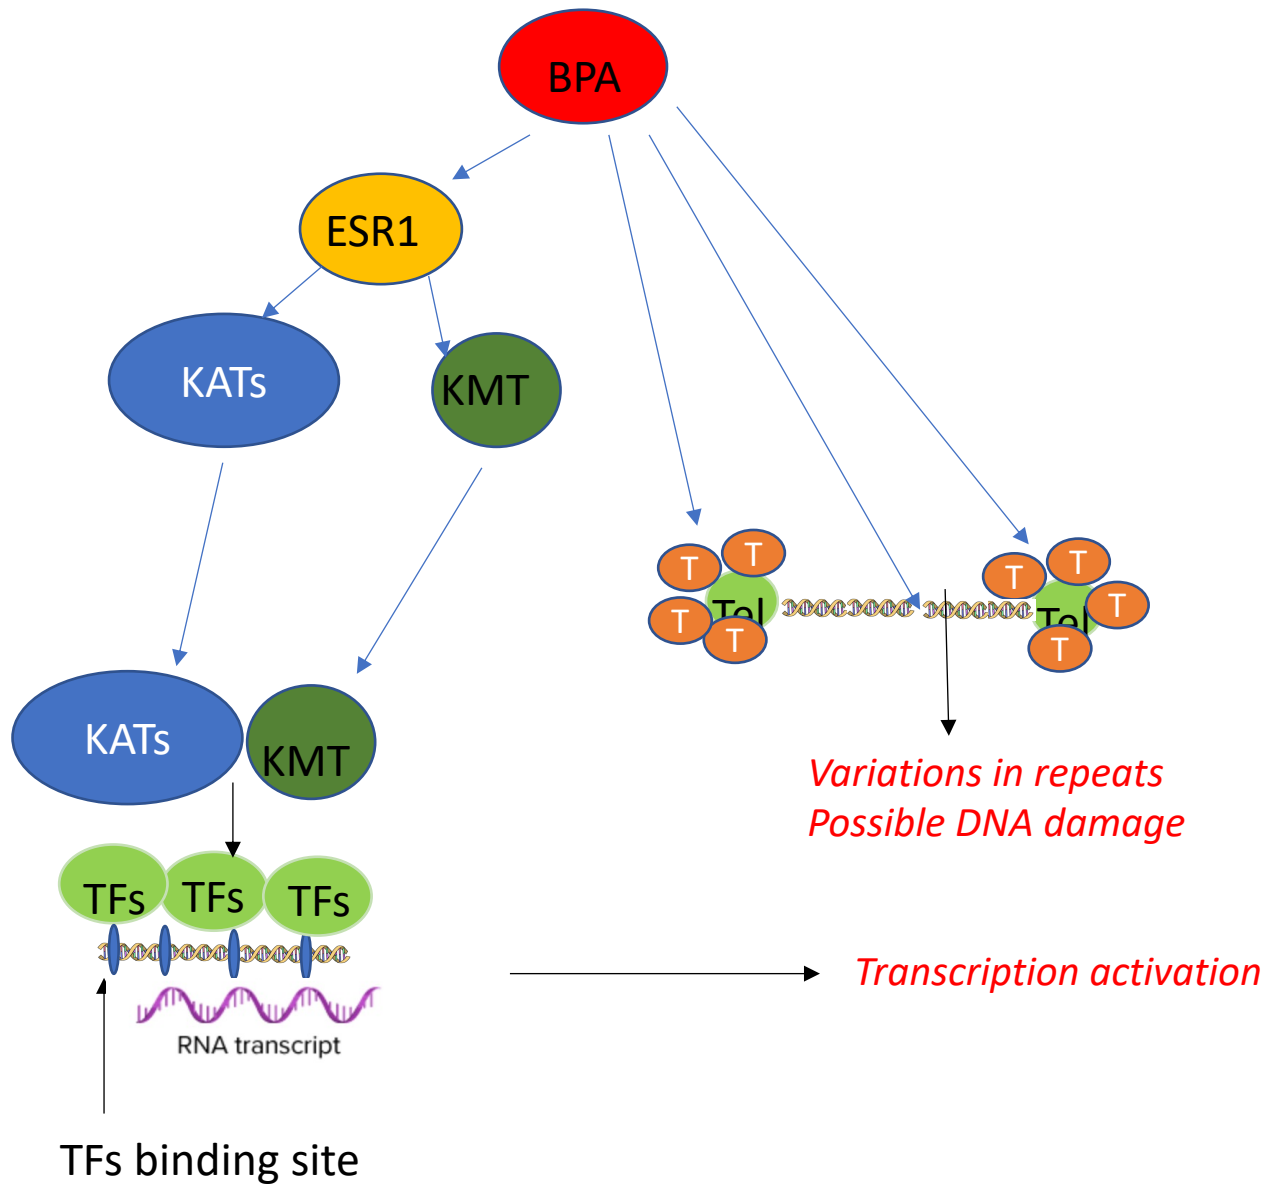

**Figure S4.** A proposed mechanism of BPA action. BPA stabilizes ESR1, which in turn activates histone acetyltransferases and methyltransferases and thereby increases access to chromatin. This complex activates the gene expression at several regions. In addition, the genotoxic effect of BPA induces the expression of telomere maintenance genes and DNA repair factors.

Table S1. The human samples used for the DNA repeat analysis

| <b>N</b> | <b>BPA (microg/gram Creat)</b> | <b>BPA group</b> |
|----------|--------------------------------|------------------|
| 1        | 0,66                           | low              |
| 2        | 0,73                           | low              |
| 3        | 1,1                            | low              |
| 4        | 1,12                           | low              |
| 5        | 1,28                           | low              |
| 6        | 2,13                           | low              |
| 7        | 2,31                           | low              |
| 8        | 2,35                           | low              |
| 9        | 2,43                           | low              |
| 10       | 2,55                           | low              |
| 11       | 3,1                            | low              |
| 12       | 3,94                           | low              |
| 13       | 4,47                           | low              |
| 14       | 4,55                           | low              |
| 15       | 4,57                           | low              |
| 16       | 4,67                           | low              |
| 17       | 4,85                           | high             |
| 18       | 5,1                            | high             |
| 19       | 6,28                           | high             |
| 20       | 7,46                           | high             |
| 21       | 8,14                           | high             |
| 22       | 8,98                           | high             |
| 23       | 9,44                           | high             |
| 24       | 10,07                          | high             |
| 25       | 10,55                          | high             |
| 26       | 12,24                          | high             |
| 27       | 15,87                          | high             |
| 28       | 17,11                          | high             |
| 29       | 19,57                          | high             |
| 30       | 39,34                          | high             |
| 31       | 42,64                          | high             |

Note, Creat., creatinine, microg., microgram

Table S2. The human samples used for DNA methylation analysis

|    | <b>BPA (microg/gram Creatinine)</b> | <b>BPA group</b> |
|----|-------------------------------------|------------------|
| 1  | 0,66                                | low              |
| 2  | 0,73                                | low              |
| 3  | 1,1                                 | low              |
| 4  | 1,12                                | low              |
| 5  | 1,28                                | low              |
| 6  | 2,13                                | low              |
| 7  | 2,31                                | low              |
| 8  | 2,35                                | low              |
| 9  | 2,43                                | low              |
| 10 | 2,55                                | low              |
| 11 | 3,1                                 | low              |
| 12 | 3,94                                | low              |
| 13 | 9,44                                | high             |
| 14 | 10,07                               | high             |
| 15 | 10,55                               | high             |
| 16 | 12,24                               | high             |
| 17 | 15,87                               | high             |
| 18 | 17,11                               | high             |
| 19 | 19,57                               | high             |
| 20 | 39,34                               | high             |
| 21 | 42,64                               | high             |

Note, Creat., creatinine, microg., microgram

Table S3. The human samples used for Chip-seq analysis

| <b>N</b> | <b>BPA (microg/gram Creat)</b> | <b>BPA gpoup</b> |
|----------|--------------------------------|------------------|
| 1        | 0,66                           | low              |
| 2        | 0,73                           | low              |
| 3        | 1,1                            | low              |
| 4        | 1,12                           | low              |
| 5        | 1,28                           | low              |
| 6        | 2,13                           | low              |
| 7        | 2,31                           | low              |
| 8        | 2,35                           | low              |
| 9        | 2,43                           | low              |
| 10       | 2,55                           | low              |
| 11       | 10,07                          | high             |
| 12       | 10,55                          | high             |
| 13       | 12,24                          | high             |
| 14       | 17,11                          | high             |
| 15       | 19,57                          | high             |
| 16       | 39,34                          | high             |
| 17       | 42,64                          | high             |

Note, Creat., creatinine, microg., microgram



Table S4. Genes encoding telomeric DNA binding proteins located in differential peaks

| Gene      | distance to TSS    | description                                                      |
|-----------|--------------------|------------------------------------------------------------------|
| ACD       | (+344)             | ACD shelterin complex subunit and telomerase recruitment factor  |
| CTC1      | (+25,553)          | CST telomere replication complex component 1                     |
| HNRNPA2B1 | (+95)              | heterogeneous nuclear ribonucleoprotein A2/B1                    |
| HNRNPD    | (+570)             | heterogeneous nuclear ribonucleoprotein D                        |
| KDM1A     | (+228), (+148,773) | lysine demethylase 1A                                            |
| NABP2     | (-2,573)           | nucleic acid binding protein 2                                   |
| NCL       | (+178)             | nucleolin                                                        |
| PURA      | (-6,082), (+8)     | purine rich element binding protein A                            |
| RPA1      | (-43)              | replication protein A1                                           |
| SMG1      | (+218)             | SMG1 nonsense mediated mRNA decay associated PI3K related kinase |
| SMG5      | (+149)             | SMG5 nonsense mediated mRNA decay factor                         |
| SMG6      | (+145)             | SMG6 nonsense mediated mRNA decay factor                         |
| SMG7      | (-527)             | SMG7 nonsense mediated mRNA decay factor                         |
| TEN1      | (+101)             | TEN1 subunit of CST complex                                      |
| TERF2IP   | (+830)             | TERF2 interacting protein                                        |
| TERT      | (+96)              | telomerase reverse transcriptase                                 |
| TP53BP1   | (+190)             | tumor protein p53 binding protein 1                              |
| UPF1      | (+815)             | UPF1 RNA helicase and ATPase                                     |
| UPF2      | (-6,794)           | UPF2 regulator of nonsense mediated mRNA decay                   |
| UPF3A     | (+282)             | UPF3A regulator of nonsense mediated mRNA decay                  |
| XRCC6     | (-234)             | X-ray repair cross complementing 6                               |
| ZBTB48    | (+288), (+21,528)  | zinc finger and BTB domain containing 48                         |

Table S5. Genes encoding ESR1-interacting proteins located in differential H3K4me3 peaks

|            |                                                                           |            |                                                                                      |
|------------|---------------------------------------------------------------------------|------------|--------------------------------------------------------------------------------------|
| Gene       | description                                                               |            |                                                                                      |
| 1AHR       | aryl hydrocarbon receptor                                                 | 61CALM1    | calmodulin 1                                                                         |
| 2ESRRA     | estrogen related receptor alpha                                           | 62CALM2    | calmodulin 2                                                                         |
| 3NCOR1     | nuclear receptor corepressor 1                                            | 63CALM2    | calmodulin 3                                                                         |
| 4NCOR2     | nuclear receptor corepressor 2                                            | 64CALM2    | calmodulin 1                                                                         |
| 5NR2F6     | nuclear receptor subfamily 2 group F member 6                             | 65CALM3    | calmodulin 3                                                                         |
| 6PSMD2     | proteasome 26S subunit ubiquitin receptor, non-ATPase 2                   | 66CAND1    | cullin associated and neddylation dissociated 1                                      |
| 7RARA      | retinoic acid receptor alpha                                              | 67CAPRIN1  | cell cycle associated protein 1                                                      |
| 8RXRA      | retinoid X receptor alpha                                                 | 68CAPZB    | capping actin protein of muscle Z-line subunit beta                                  |
| 9TFRC      | transferrin receptor                                                      | 69CCDC110  | coiled-coil domain containing 110                                                    |
| 10ABCC5    | ATP binding cassette subfamily C member 5                                 | 70CCT7     | chaperonin containing TCP1 subunit 7                                                 |
| 11ABCF1    | ATP binding cassette subfamily F member 1                                 | 71CD47     | CD47 molecule                                                                        |
| 12ABL1     | ABL proto-oncogene 1, non-receptor tyrosine kinase                        | 72CDC25B   | cell division cycle 25B                                                              |
| 13ACAA1    | acetyl-CoA acyltransferase 1                                              | 73CDK11B   | cyclin dependent kinase 11B                                                          |
| 14ACLY     | ATP citrate lyase                                                         | 74CDK5     | cyclin dependent kinase 5                                                            |
| 15ACO2     | aconitase 2                                                               | 75CDK8     | cyclin dependent kinase 8                                                            |
| 16ACTB     | actin beta                                                                | 76CEBPA    | CCAAT enhancer binding protein alpha                                                 |
| 17ACTN1    | actinin alpha 1                                                           | 77CEBPB    | CCAAT enhancer binding protein beta                                                  |
| 18ACTN4    | actinin alpha 4                                                           | 78CFL1     | cofilin 1                                                                            |
| 19ACTR2    | actin related protein 2                                                   | 79CHD3     | chromodomain helicase DNA binding protein 3                                          |
| 20ACTR3    | actin related protein 3                                                   | 80CHD4     | chromodomain helicase DNA binding protein 4                                          |
| 21AHNAK    | AHNAK nucleoprotein                                                       | 81CHD9     | chromodomain helicase DNA binding protein 9                                          |
| 22AIFM1    | apoptosis inducing factor mitochondria associated 1                       | 82CHUK     | component of inhibitor of nuclear factor kappa B kinase complex                      |
| 23AKAP13   | A-kinase anchoring protein 13                                             | 83CLTC     | clathrin heavy chain                                                                 |
| 24AKAP8    | A-kinase anchoring protein 8                                              | 84CNDP2    | carnosine dipeptidase 2                                                              |
| 25AKT2     | AKT serine/threonine kinase 2                                             | 85CNOT1    | CCR4-NOT transcription complex subunit 1                                             |
| 26ALDH18A1 | aldehyde dehydrogenase 18 family member A1                                | 86COPA     | COP1 coat complex subunit alpha                                                      |
| 27ALDOA    | aldolase, fructose-bisphosphate A                                         | 87COPB1    | COP1 coat complex subunit beta 1                                                     |
| 28ALKBH7   | alkB homolog 7                                                            | 88COP55    | COP9 signalosome subunit 5                                                           |
| 29ANP32A   | acidic nuclear phosphoprotein 32 family member A                          | 89CSE1L    | chromosome segregation 1 like                                                        |
| 30ANP32B   | acidic nuclear phosphoprotein 32 family member B                          | 90CSNK2A1  | casein kinase 2 alpha 1                                                              |
| 31ANXA2    | annexin A2                                                                | 91CSNK2B   | casein kinase 2 beta                                                                 |
| 32AP2M1    | adaptor related protein complex 2 subunit mu 1                            | 92CSNK2B   | novel protein                                                                        |
| 33APOD     | apolipoprotein D                                                          | 93CTNNB1   | catenin beta 1                                                                       |
| 34ARF1     | ADP ribosylation factor 1                                                 | 94CTSD     | cathepsin D                                                                          |
| 35ARFGAP2  | ADP ribosylation factor GTPase activating protein 2                       | 95CUL4B    | cullin 4B                                                                            |
| 36ARHGDI2  | Rho GDP dissociation inhibitor alpha                                      | 96DAGLB    | diacylglycerol lipase beta                                                           |
| 37ARID5A   | AT-rich interaction domain 5A                                             | 97DAP3     | death associated protein 3                                                           |
| 38ARNT     | aryl hydrocarbon receptor nuclear translocator                            | 98DBN1     | drebrin 1                                                                            |
| 39ARPC4    | actin related protein 2/3 complex subunit 4                               | 99DDOST    | dolichyl-diphosphooligosaccharide--protein glycosyltransferase non-catalytic subunit |
| 40ARSB     | arylsulfatase B                                                           | 100DDX17   | DEAD-box helicase 17                                                                 |
| 41ASF1A    | anti-silencing function 1A histone chaperone                              | 101DDX18   | DEAD-box helicase 18                                                                 |
| 42ASH2L    | ASH2 like, histone lysine methyltransferase complex subunit               | 102DDX21   | DEAD-box helicase 21                                                                 |
| 43ASXL1    | ASXL transcriptional regulator 1                                          | 103DDX3X   | DEAD-box helicase 3 X-linked                                                         |
| 44ATAD2    | ATPase family AAA domain containing 2                                     | 104DDX5    | DEAD-box helicase 5                                                                  |
| 45ATAD3A   | ATPase family AAA domain containing 3A                                    | 105DDX54   | DEAD-box helicase 54                                                                 |
| 46ATF1     | activating transcription factor 1                                         | 106DECR1   | 2,4-dienoyl-CoA reductase 1                                                          |
| 47ATP1A1   | ATPase Na <sup>+</sup> /K <sup>+</sup> transporting subunit alpha 1       | 107DEK     | DEK proto-oncogene                                                                   |
| 48ATP2A2   | ATPase sarcoplasmic/endoplasmic reticulum Ca <sup>2+</sup> transporting 2 | 108DHX15   | DEAH-box helicase 15                                                                 |
| 49ATP2B1   | ATPase plasma membrane Ca <sup>2+</sup> transporting 1                    | 109DHX30   | DEXH-box helicase 30                                                                 |
| 50ATP5B    | None                                                                      | 110DHX9    | DEXH-box helicase 9                                                                  |
| 51ATP5F1   | None                                                                      | 111DKC1    | dyskerin pseudouridine synthase 1                                                    |
| 52BAG1     | BAG cochaperone 1                                                         | 112DNAJB11 | DnaJ heat shock protein family (Hsp40) member B11                                    |
| 53BARD1    | BRCA1 associated RING domain 1                                            | 113DNM1L   | dynamamin 1 like                                                                     |
| 54BAZ1B    | bromodomain adjacent to zinc finger domain 1B                             | 114DTD1    | D-aminoacyl-tRNA deacylase 1                                                         |
| 55BCL3     | BCL3 transcription coactivator                                            | 115DYNC1H1 | dynein cytoplasmic 1 heavy chain 1                                                   |
| 56BCLAF1   | BCL2 associated transcription factor 1                                    | 116EDF1    | endothelial differentiation related factor 1                                         |
| 57BLCAP    | BLCAP apoptosis inducing factor                                           | 117EEF1A1  | eukaryotic translation elongation factor 1 alpha 1                                   |
| 58BTF3     | basic transcription factor 3                                              | 118EEF2    | eukaryotic translation elongation factor 2                                           |
| 59BZW1     | basic leucine zipper and W2 domains 1                                     | 119EHMT2   | euchromatic histone lysine methyltransferase 2                                       |
| 60CALM1    | calmodulin 3                                                              | 120EIF3F   | eukaryotic translation initiation factor 3 subunit F                                 |

Table S5. Genes encoding ESR1-interacting proteins located in differential H3K4me3 peaks

|               |                                                           |              |                                                                    |
|---------------|-----------------------------------------------------------|--------------|--------------------------------------------------------------------|
| 121 EIF4A1    | eukaryotic translation initiation factor 4A1              | 181 HNRNPAB  | heterogeneous nuclear ribonucleoprotein A/B                        |
| 122 EIF4G1    | eukaryotic translation initiation factor 4 gamma 1        | 182 HNRNPD   | heterogeneous nuclear ribonucleoprotein D                          |
| 123 ELMSAN1   | None                                                      | 183 HNRNPF   | heterogeneous nuclear ribonucleoprotein F                          |
| 124 EMD       | emerin                                                    | 184 HNRNPK   | heterogeneous nuclear ribonucleoprotein K                          |
| 125 ENO1      | enolase 1                                                 | 185 HNRNPL   | heterogeneous nuclear ribonucleoprotein L                          |
| 126 EP300     | E1A binding protein p300                                  | 186 HNRNPM   | heterogeneous nuclear ribonucleoprotein M                          |
| 127 EP400     | E1A binding protein p400                                  | 187 HNRNPR   | heterogeneous nuclear ribonucleoprotein R                          |
| 128 EPPK1     | epiplakin 1                                               | 188 HNRNPU   | heterogeneous nuclear ribonucleoprotein U                          |
| 129 ESYT1     | extended synaptotagmin 1                                  | 189 HNRNPUL1 | heterogeneous nuclear ribonucleoprotein U like 1                   |
| 130 EWSR1     | EWS RNA binding protein 1                                 | 190 HPCAL1   | hippocalcin like 1                                                 |
| 131 EXOSC10   | exosome component 10                                      | 191 HSP90AA1 | heat shock protein 90 alpha family class A member 1                |
| 132 EXOSC4    | exosome component 4                                       | 192 HSP90AB1 | heat shock protein 90 alpha family class B member 1                |
| 133 EZH2      | enhancer of zeste 2 polycomb repressive complex 2 subunit | 193 HSP90B1  | heat shock protein 90 beta family member 1                         |
| 134 EZR       | ezrin                                                     | 194 HSPA1B   | heat shock protein family A (Hsp70) member 1B                      |
| 135 FAF2      | Fas associated factor family member 2                     | 195 HSPA1L   | heat shock protein family A (Hsp70) member 1 like                  |
| 136 FAM120A   | family with sequence similarity 120A                      | 196 HSPA4    | heat shock protein family A (Hsp70) member 4                       |
| 137 FAM213A   | None                                                      | 197 HSPA5    | heat shock protein family A (Hsp70) member 5                       |
| 138 FASN      | fatty acid synthase                                       | 198 HSPA8    | heat shock protein family A (Hsp70) member 8                       |
| 139 FIS1      | fission, mitochondrial 1                                  | 199 HSPA9    | heat shock protein family A (Hsp70) member 9                       |
| 140 FKBP1A    | FKBP prolyl isomerase 1A                                  | 200 HSPD1    | heat shock protein family D (Hsp60) member 1                       |
| 141 FKBP5     | FKBP prolyl isomerase 5                                   | 201 HSP E1   | heat shock protein family E (Hsp10) member 1                       |
| 142 FLII      | FLII actin remodeling protein                             | 202 HSPH1    | heat shock protein family H (Hsp110) member 1                      |
| 143 FLNA      | filamin A                                                 | 203 HUWE1    | HECT, UBA and WWE domain containing E3 ubiquitin protein ligase 1  |
| 144 FMR1      | FMRP translational regulator 1                            | 204 HYOU1    | hypoxia up-regulated 1                                             |
| 145 FOS       | Fos proto-oncogene, AP-1 transcription factor subunit     | 205 IDH2     | isocitrate dehydrogenase (NADP(+)) 2                               |
| 146 FOXL2     | forkhead box L2                                           | 206 ILF3     | interleukin enhancer binding factor 3                              |
| 147 FOXO1     | forkhead box O1                                           | 207 IMMT     | inner membrane mitochondrial protein                               |
| 148 FOXO3     | forkhead box O3                                           | 208 INGI1    | inhibitor of growth family member 1                                |
| 149 FTSJ3     | FtsJ RNA 2'-O-methyltransferase 3                         | 209 INTS1    | integrator complex subunit 1                                       |
| 150 FUS       | FUS RNA binding protein                                   | 210 IPO7     | importin 7                                                         |
| 151 G3BP2     | G3BP stress granule assembly factor 2                     | 211 IQGAP1   | IQ motif containing GTPase activating protein 1                    |
| 152 GADD45A   | growth arrest and DNA damage inducible alpha              | 212 IRS2     | insulin receptor substrate 2                                       |
| 153 GADD45B   | growth arrest and DNA damage inducible beta               | 213 JUNB     | JunB proto-oncogene, AP-1 transcription factor subunit             |
| 154 GAK       | cyclin G associated kinase                                | 214 JUND     | JunD proto-oncogene, AP-1 transcription factor subunit             |
| 155 GAPDH     | glyceraldehyde-3-phosphate dehydrogenase                  | 215 KAT2A    | lysine acetyltransferase 2A                                        |
| 156 GARS      | None                                                      | 216 KAT5     | lysine acetyltransferase 5                                         |
| 157 GLYR1     | glyoxylate reductase 1 homolog                            | 217 KAT6A    | lysine acetyltransferase 6A                                        |
| 158 GNB1      | G protein subunit beta 1                                  | 218 KDM1A    | lysine demethylase 1A                                              |
| 159 GNB2      | G protein subunit beta 2                                  | 219 KDM4A    | lysine demethylase 4A                                              |
| 160 GNL3      | G protein nucleolar 3                                     | 220 KDM4C    | lysine demethylase 4C                                              |
| 161 GOLGA2    | golgin A2                                                 | 221 KHDRBS1  | KH RNA binding domain containing, signal transduction associated 1 |
| 162 GRB2      | growth factor receptor bound protein 2                    | 222 KPNB1    | karyopherin subunit beta 1                                         |
| 163 GSK3B     | glycogen synthase kinase 3 beta                           | 223 LACTB    | lactamase beta                                                     |
| 164 GTF3C4    | general transcription factor IIIC subunit 4               | 224 LARP1    | La ribonucleoprotein 1, translational regulator                    |
| 165 H2AFX     | None                                                      | 225 LCK      | LCK proto-oncogene, Src family tyrosine kinase                     |
| 166 H3F3A     | None                                                      | 226 LCOR     | ligand dependent nuclear receptor corepressor                      |
| 167 HAX1      | HCLS1 associated protein X-1                              | 227 LDB1     | LIM domain binding 1                                               |
| 168 HDAC1     | histone deacetylase 1                                     | 228 LGALS7B  | galectin 7B                                                        |
| 169 HDAC2     | histone deacetylase 2                                     | 229 LGALS7B  | galectin 7                                                         |
| 170 HDAC3     | histone deacetylase 3                                     | 230 LMNB1    | lamin B1                                                           |
| 171 HDAC4     | histone deacetylase 4                                     | 231 LUC7L3   | LUC7 like 3 pre-mRNA splicing factor                               |
| 172 HDAC5     | histone deacetylase 5                                     | 232 LYAR     | Ly1 antibody reactive                                              |
| 173 HEBP2     | heme binding protein 2                                    | 233 MAP3K1   | mitogen-activated protein kinase kinase 1                          |
| 174 HIF1A     | hypoxia inducible factor 1 subunit alpha                  | 234 MAPK14   | mitogen-activated protein kinase 14                                |
| 175 HIST4H4   | None                                                      | 235 MAPK3    | mitogen-activated protein kinase 3                                 |
| 176 HM13      | histocompatibility minor 13                               | 236 MARK2    | microtubule affinity regulating kinase 2                           |
| 177 HMGB2     | high mobility group box 2                                 | 237 MBD2     | methyl-CpG binding domain protein 2                                |
| 178 HNRNPA0   | heterogeneous nuclear ribonucleoprotein A0                | 238 MCM5     | minichromosome maintenance complex component 5                     |
| 179 HNRNPA2B1 | heterogeneous nuclear ribonucleoprotein A2/B1             | 239 MDH2     | malate dehydrogenase 2                                             |
| 180 HNRNPA3   | heterogeneous nuclear ribonucleoprotein A3                | 240 MDM2     | MDM2 proto-oncogene                                                |

Table S5. Genes encoding ESR1-interacting proteins located in differential H3K4me3 peaks

|            |                                                                        |              |                                                                |
|------------|------------------------------------------------------------------------|--------------|----------------------------------------------------------------|
| 241 MED12  | mediator complex subunit 12                                            | 301 PIK3R1   | phosphoinositide-3-kinase regulatory subunit 1                 |
| 242 MED14  | mediator complex subunit 14                                            | 302 PIK3R2   | phosphoinositide-3-kinase regulatory subunit 2                 |
| 243 MED16  | mediator complex subunit 16                                            | 303 PLEC     | plectin                                                        |
| 244 MED17  | mediator complex subunit 17                                            | 304 PNRC2    | proline rich nuclear receptor coactivator 2                    |
| 245 MED20  | mediator complex subunit 20                                            | 305 POLR1B   | RNA polymerase I subunit B                                     |
| 246 MED25  | mediator complex subunit 25                                            | 306 POLR2D   | RNA polymerase II subunit D                                    |
| 247 MEN1   | menin 1                                                                | 307 POR      | cytochrome p450 oxidoreductase                                 |
| 248 MGMT   | O-6-methylguanine-DNA methyltransferase                                | 308 POU2F1   | POU class 2 homeobox 1                                         |
| 249 MKI67  | marker of proliferation Ki-67                                          | 309 POU2F2   | POU class 2 homeobox 2                                         |
| 250 MKNK2  | MAPK interacting serine/threonine kinase 2                             | 310 PPARGC1B | PPARG coactivator 1 beta                                       |
| 251 MMS19  | MMS19 homolog, cytosolic iron-sulfur assembly component                | 311 PPP1CA   | protein phosphatase 1 catalytic subunit alpha                  |
| 252 MOGS   | mannosyl-oligosaccharide glucosidase                                   | 312 PPP1CC   | protein phosphatase 1 catalytic subunit gamma                  |
| 253 MPG    | N-methylpurine DNA glycosylase                                         | 313 PPP5C    | protein phosphatase 5 catalytic subunit                        |
| 254 MRPS2  | mitochondrial ribosomal protein S2                                     | 314 PRDM2    | PR/SET domain 2                                                |
| 255 MRPS27 | mitochondrial ribosomal protein S27                                    | 315 PRDX2    | peroxiredoxin 2                                                |
| 256 MRPS6  | mitochondrial ribosomal protein S6                                     | 316 PRDX3    | peroxiredoxin 3                                                |
| 257 MSH2   | mutS homolog 2                                                         | 317 PRDX6    | peroxiredoxin 6                                                |
| 258 MSH6   | mutS homolog 6                                                         | 318 PRKAR2A  | protein kinase cAMP-dependent type II regulatory subunit alpha |
| 259 MTA2   | metastasis associated 1 family member 2                                | 319 PRKCA    | protein kinase C alpha                                         |
| 260 MTA3   | metastasis associated 1 family member 3                                | 320 PRKCB    | protein kinase C zeta                                          |
| 261 MTCH2  | mitochondrial carrier 2                                                | 321 PRKDC    | protein kinase, DNA-activated, catalytic subunit               |
| 262 MTDH   | metadherin                                                             | 322 PRMT1    | protein arginine methyltransferase 1                           |
| 263 MVP    | major vault protein                                                    | 323 PRMT2    | protein arginine methyltransferase 2                           |
| 264 MYH9   | myosin heavy chain 9                                                   | 324 PRPF4B   | pre-mRNA processing factor 4B                                  |
| 265 MYL6   | myosin light chain 6                                                   | 325 PSIP1    | PC4 and SFRS1 interacting protein 1                            |
| 266 NCL    | nucleolin                                                              | 326 PSMAS5   | proteasome 20S subunit alpha 5                                 |
| 267 NCOA2  | nuclear receptor coactivator 2                                         | 327 PSMB9    | proteasome 20S subunit beta 9                                  |
| 268 NCOA3  | nuclear receptor coactivator 3                                         | 328 PSMC5    | proteasome 26S subunit, ATPase 5                               |
| 269 NCOA4  | nuclear receptor coactivator 4                                         | 329 PSMC1    | proteasome 26S subunit, non-ATPase 1                           |
| 270 NCOA5  | nuclear receptor coactivator 5                                         | 330 PSMC6    | proteasome 26S subunit, non-ATPase 6                           |
| 271 NCOA6  | nuclear receptor coactivator 6                                         | 331 PTGES3   | prostaglandin E synthase 3                                     |
| 272 NCOA7  | nuclear receptor coactivator 7                                         | 332 PTMA     | prothymosin alpha                                              |
| 273 NME2   | NME/NM23 nucleoside diphosphate kinase 2                               | 333 PTPN1    | protein tyrosine phosphatase non-receptor type 1               |
| 274 NOP2   | NOP2 nucleolar protein                                                 | 334 PTPN6    | protein tyrosine phosphatase non-receptor type 6               |
| 275 NOP56  | NOP56 ribonucleoprotein                                                | 335 PUS1     | pseudouridine synthase 1                                       |
| 276 NOP58  | NOP58 ribonucleoprotein                                                | 336 PYGB     | glycogen phosphorylase B                                       |
| 277 NPEPPS | aminopeptidase puromycin sensitive                                     | 337 RAB10    | RAB10, member RAS oncogene family                              |
| 278 NR2C2  | nuclear receptor subfamily 2 group C member 2                          | 338 RAB1A    | RAB1A, member RAS oncogene family                              |
| 279 NSD1   | nuclear receptor binding SET domain protein 1                          | 339 RAB1B    | RAB1B, member RAS oncogene family                              |
| 280 NSDHL  | NAD(P) dependent steroid dehydrogenase-like                            | 340 RAB7A    | RAB7A, member RAS oncogene family                              |
| 281 NUP153 | nucleoporin 153                                                        | 341 RABGEF1  | RAB guanine nucleotide exchange factor 1                       |
| 282 OTUB1  | OTU deubiquitinase, ubiquitin aldehyde binding 1                       | 342 RAP1A    | RAP1A, member of RAS oncogene family                           |
| 283 OXSR1  | oxidative stress responsive kinase 1                                   | 343 RAP2C    | RAP2C, member of RAS oncogene family                           |
| 284 P4HB   | prolyl 4-hydroxylase subunit beta                                      | 344 RBBP4    | RB binding protein 4, chromatin remodeling factor              |
| 285 PABPC1 | poly(A) binding protein cytoplasmic 1                                  | 345 RBBP6    | RB binding protein 6, ubiquitin ligase                         |
| 286 PAK1   | p21 (RAC1) activated kinase 1                                          | 346 RBCK1    | RANBP2-type and C3HC4-type zinc finger containing 1            |
| 287 PCBP1  | poly(rC) binding protein 1                                             | 347 RBM14    | RNA binding motif protein 14                                   |
| 288 PCK2   | phosphoenolpyruvate carboxykinase 2, mitochondrial                     | 348 RBMX     | RNA binding motif protein X-linked                             |
| 289 PDIA3  | protein disulfide isomerase family A member 3                          | 349 RCN2     | reticulocalbin 2                                               |
| 290 PDIA4  | protein disulfide isomerase family A member 4                          | 350 REEP6    | receptor accessory protein 6                                   |
| 291 PELP1  | proline, glutamate and leucine rich protein 1                          | 351 RELA     | RELA proto-oncogene, NF-kB subunit                             |
| 292 PFKL   | phosphofructokinase, liver type                                        | 352 REXO4    | REX4 homolog, 3'-5' exonuclease                                |
| 293 PFKP   | phosphofructokinase, platelet                                          | 353 RNF14    | ring finger protein 14                                         |
| 294 PFN1   | profilin 1                                                             | 354 RNF4     | ring finger protein 4                                          |
| 295 PGM2   | phosphoglucomutase 2                                                   | 355 RPL10    | ribosomal protein L10                                          |
| 296 PHB2   | prohibitin 2                                                           | 356 RPL10A   | ribosomal protein L10a                                         |
| 297 PHGDH  | phosphoglycerate dehydrogenase                                         | 357 RPL13    | ribosomal protein L13                                          |
| 298 PIAS1  | protein inhibitor of activated STAT 1                                  | 358 RPL14    | ribosomal protein L14                                          |
| 299 PIAS3  | protein inhibitor of activated STAT 3                                  | 359 RPL15    | ribosomal protein L15                                          |
| 300 PIK3CA | phosphatidylinositol-4,5-bisphosphate 3-kinase catalytic subunit alpha | 360 RPL18A   | ribosomal protein L18a                                         |

Table S5. Genes encoding ESR1-interacting proteins located in differential H3K4me3 peaks

|             |                                                                                                   |             |                                                                        |
|-------------|---------------------------------------------------------------------------------------------------|-------------|------------------------------------------------------------------------|
| 361RPL19    | ribosomal protein L19                                                                             | 421SP3      | Sp3 transcription factor                                               |
| 362RPL22    | ribosomal protein L22                                                                             | 422SPOP     | speckle type BTB/POZ protein                                           |
| 363RPL28    | ribosomal protein L28                                                                             | 423SPTAN1   | spectrin alpha, non-erythrocytic 1                                     |
| 364RPL36AL  | ribosomal protein L36a like                                                                       | 424SREBF1   | sterol regulatory element binding transcription factor 1               |
| 365RPL5     | ribosomal protein L5                                                                              | 425SRPK1    | SRSF protein kinase 1                                                  |
| 366RPL7     | ribosomal protein L7                                                                              | 426SRRM1    | serine and arginine repetitive matrix 1                                |
| 367RPL7A    | ribosomal protein L7a                                                                             | 427SRRM2    | serine/arginine repetitive matrix 2                                    |
| 368RPL8     | ribosomal protein L8                                                                              | 428SRSF1    | serine and arginine rich splicing factor 1                             |
| 369RPLP0    | ribosomal protein lateral stalk subunit P0                                                        | 429SRSF2    | serine and arginine rich splicing factor 2                             |
| 370RPN1     | ribophorin I                                                                                      | 430SRSF5    | serine and arginine rich splicing factor 5                             |
| 371RPN2     | ribophorin II                                                                                     | 431SRSF6    | serine and arginine rich splicing factor 6                             |
| 372RPS11    | ribosomal protein S11                                                                             | 432SRSF7    | serine and arginine rich splicing factor 7                             |
| 373RPS14    | ribosomal protein S14                                                                             | 433STAT3    | signal transducer and activator of transcription 3                     |
| 374RPS15A   | ribosomal protein S15a                                                                            | 434STAT5A   | signal transducer and activator of transcription 5A                    |
| 375RPS19    | ribosomal protein S19                                                                             | 435STAU1    | staufen double-stranded RNA binding protein 1                          |
| 376RPS2     | ribosomal protein S2                                                                              | 436STRN     | striatin                                                               |
| 377RPS20    | ribosomal protein S20                                                                             | 437STUB1    | STIP1 homology and U-box containing protein 1                          |
| 378RPS23    | ribosomal protein S23                                                                             | 438SUMO1    | small ubiquitin like modifier 1                                        |
| 379RPS24    | ribosomal protein S24                                                                             |             |                                                                        |
| 380RPS25    | ribosomal protein S25                                                                             | 439SYNCRIP  | synaptotagmin binding cytoplasmic RNA interacting protein              |
| 381RPS3A    | ribosomal protein S3A                                                                             | 440TAB2     | TGF-beta activated kinase 1 (MAP3K7) binding protein 2                 |
| 382RPS6KA1  | ribosomal protein S6 kinase A1                                                                    | 441TADA3    | transcriptional adaptor 3                                              |
| 383RPS6KA3  | ribosomal protein S6 kinase A3                                                                    |             |                                                                        |
| 384RPS6KB1  | ribosomal protein S6 kinase B1                                                                    | 442TAF1B    | TATA-box binding protein associated factor, RNA polymerase I subunit B |
| 385RPS7     | ribosomal protein S7                                                                              |             |                                                                        |
| 386RPS8     | ribosomal protein S8                                                                              | 443TAGLN2   | transgelin 2                                                           |
| 387RRP1B    | ribosomal RNA processing 1B                                                                       | 444TAP1     | transporter 1, ATP binding cassette subfamily B member                 |
| 388RRS1     | ribosome biogenesis regulator 1 homolog                                                           | 445TBL2     | transducin beta like 2                                                 |
| 389RSL1D1   | ribosomal L1 domain containing 1                                                                  | 446TBP      | TATA-box binding protein                                               |
| 390SAFB     | scaffold attachment factor B                                                                      | 447TCF20    | transcription factor 20                                                |
| 391SAFB2    | scaffold attachment factor B2                                                                     | 448TCF7L1   | transcription factor 7 like 1                                          |
| 392SCYL2    | SCY1 like pseudokinase 2                                                                          | 449THEM6    | thioesterase superfamily member 6                                      |
| 393SEC11A   | SEC11 homolog A, signal peptidase complex subunit                                                 | 450THRAP3   | thyroid hormone receptor associated protein 3                          |
| 394SEC22B   | SEC22 homolog B, vesicle trafficking protein                                                      | 451TKT      | transketolase                                                          |
| 395SEC23A   | SEC23 homolog A, COPII coat complex component                                                     | 452TMED10   | transmembrane p24 trafficking protein 10                               |
| 396SEC61B   | SEC61 translocon subunit beta                                                                     | 453TMED2    | transmembrane p24 trafficking protein 2                                |
| 397SENP5    | SUMO specific peptidase 5                                                                         | 454TMOD3    | tropomodulin 3                                                         |
| 398SETD7    | SET domain containing 7, histone lysine methyltransferase                                         | 455TMX1     | thioredoxin related transmembrane protein 1                            |
| 399SF1      | splicing factor 1                                                                                 | 456TNFRSF14 | TNF receptor superfamily member 14                                     |
| 400SIN3A    | SIN3 transcription regulator family member A                                                      | 457TNPO2    | transportin 2                                                          |
| 401SIN3B    | SIN3 transcription regulator family member B                                                      | 458TOP1     | DNA topoisomerase I                                                    |
| 402SIRT1    | sirtuin 1                                                                                         | 459TOP2B    | DNA topoisomerase II beta                                              |
| 403SKI      | SKI proto-oncogene                                                                                | 460TOR1AIP1 | torsin 1A interacting protein 1                                        |
| 404SKIL     | SKI like proto-oncogene                                                                           | 461TPM1     | tropomyosin 1                                                          |
| 405SLC25A5  | solute carrier family 25 member 5                                                                 | 462TRAF6    | TNF receptor associated factor 6                                       |
| 406SLC30A9  | solute carrier family 30 member 9                                                                 | 463TRAM1    | translocation associated membrane protein 1                            |
| 407SLC3A2   | solute carrier family 3 member 2                                                                  | 464TRAP1    | TNF receptor associated protein 1                                      |
| 408SLC9A3R1 | SLC9A3 regulator 1                                                                                | 465TRIM24   | tripartite motif containing 24                                         |
| 409SMAD2    | SMAD family member 2                                                                              | 466TRIM25   | tripartite motif containing 25                                         |
| 410SMARCA2  | SWI/SNF related, matrix associated, actin dependent regulator of chromatin, subfamily a, member 2 | 467TRIM59   | tripartite motif containing 59                                         |
| 411SMARCB1  | SWI/SNF related, matrix associated, actin dependent regulator of chromatin, subfamily b, member 1 | 468TRIP12   | thyroid hormone receptor interactor 12                                 |
| 412SMARCC2  | SWI/SNF related, matrix associated, actin dependent regulator of chromatin subfamily c member 2   | 469TRIP4    | thyroid hormone receptor interactor 4                                  |
| 413SMARCD1  | SWI/SNF related, matrix associated, actin dependent regulator of chromatin, subfamily d, member 1 | 470TRRAP    | transformation/transcription domain associated protein                 |
| 414SMARCD3  | SWI/SNF related, matrix associated, actin dependent regulator of chromatin, subfamily d, member 3 | 471TSC2     | TSC complex subunit 2                                                  |
| 415SMURF1   | SMAD specific E3 ubiquitin protein ligase 1                                                       | 472TUBA1A   | tubulin alpha 1a                                                       |
| 416SNRPD1   | small nuclear ribonucleoprotein D1 polypeptide                                                    | 473TUBA1C   | tubulin alpha 1c                                                       |
| 417SOS1     | SOS Ras/Rac guanine nucleotide exchange factor 1                                                  | 474TUBB     | tubulin beta class I                                                   |
| 418SOS2     | SOS Ras/Rho guanine nucleotide exchange factor 2                                                  | 475TUBB2A   | tubulin beta 2A class IIa                                              |
| 419SP1      | Sp1 transcription factor                                                                          | 476TUBB4B   | tubulin beta 4B class IVb                                              |
| 420SP2      | Sp2 transcription factor                                                                          | 477U2AF2    | U2 small nuclear RNA auxiliary factor 2                                |
|             |                                                                                                   | 478UBA3     | ubiquitin like modifier activating enzyme 3                            |
|             |                                                                                                   | 479UBAP2L   | ubiquitin associated protein 2 like                                    |
|             |                                                                                                   | 480UBC      | ubiquitin C                                                            |

Table S5. Genes encoding ESR1-interacting proteins located in differential H3K4me3 peaks

|     |         |                                                                                |
|-----|---------|--------------------------------------------------------------------------------|
| 481 | UBE2I   | ubiquitin conjugating enzyme E2 I                                              |
| 482 | UBE3A   | ubiquitin protein ligase E3A                                                   |
| 483 | UBTF    | upstream binding transcription factor                                          |
| 484 | UGDH    | UDP-glucose 6-dehydrogenase                                                    |
| 485 | UIMC1   | ubiquitin interaction motif containing 1                                       |
| 486 | UNC45A  | unc-45 myosin chaperone A                                                      |
| 487 | UPF1    | UPF1 RNA helicase and ATPase                                                   |
| 488 | USF1    | upstream transcription factor 1                                                |
| 489 | UTP14A  | UTP14A small subunit processome component                                      |
| 490 | UTP3    | UTP3 small subunit processome component                                        |
| 491 | VAPA    | VAMP associated protein A                                                      |
| 492 | VAPB    | VAMP associated protein B and C                                                |
| 493 | VCL     | vinculin                                                                       |
| 494 | VCP     | valosin containing protein                                                     |
| 495 | VDAC1   | voltage dependent anion channel 1                                              |
| 496 | VDAC3   | voltage dependent anion channel 3                                              |
| 497 | WDR1    | WD repeat domain 1                                                             |
| 498 | WDR18   | WD repeat domain 18                                                            |
| 499 | WDR5    | WD repeat domain 5                                                             |
| 500 | WIPI1   | WD repeat domain, phosphoinositide interacting 1                               |
| 501 | XBP1    | X-box binding protein 1                                                        |
| 502 | XPO1    | exportin 1                                                                     |
| 503 | XPO5    | exportin 5                                                                     |
| 504 | XRCC6   | X-ray repair cross complementing 6                                             |
| 505 | YBX1    | Y-box binding protein 1                                                        |
| 506 | YTHDF2  | YTH N6-methyladenosine RNA binding protein 2                                   |
| 507 | YWHAB   | tyrosine 3-monooxygenase/tryptophan 5-monooxygenase activation protein beta    |
| 508 | YWHAE   | tyrosine 3-monooxygenase/tryptophan 5-monooxygenase activation protein epsilon |
| 509 | YWHAQ   | tyrosine 3-monooxygenase/tryptophan 5-monooxygenase activation protein theta   |
| 510 | YWHAZ   | tyrosine 3-monooxygenase/tryptophan 5-monooxygenase activation protein zeta    |
| 511 | ZBTB17  | zinc finger and BTB domain containing 17                                       |
| 512 | ZC3HAV1 | zinc finger CCCH-type containing, antiviral 1                                  |
| 513 | ZNF398  | zinc finger protein 398                                                        |
| 514 | ZNFX1   | zinc finger NFX1-type containing 1                                             |
| 515 | ZNHIT3  | zinc finger HIT-type containing 3                                              |

Table S6. Genes encoding DNA repair proteins located in differential H3K4me3 peaks

| gene       | Description                                            |
|------------|--------------------------------------------------------|
| 1 ABL1     | ABL proto-oncogene 1, non-receptor tyrosine kinase     |
| 2 ATM      | ATM serine/threonine kinase                            |
| 3 ATR      | ATR serine/threonine kinase                            |
| 4 ATRIP    | ATR interacting protein                                |
| 5 BACH1    | BTB domain and CNC homolog 1                           |
| 6 BARD1    | BRCA1 associated RING domain 1                         |
| 7 BLM      | BLM RecQ like helicase                                 |
| 8 BRCC3    | BRCA1/BRCA2-containing complex subunit 3               |
| 9 CDK9     | cyclin dependent kinase 9                              |
| 10 CHEK2   | checkpoint kinase 2                                    |
| 11 FANCA   | FA complementation group A                             |
| 12 MDC1    | mediator of DNA damage checkpoint 1                    |
| 13 MLH1    | mutL homolog 1                                         |
| 14 MORF4L1 | mortality factor 4 like 1                              |
| 15 MSH2    | mutS homolog 2                                         |
| 16 MSH3    | mutS homolog 3                                         |
| 17 MSH6    | mutS homolog 6                                         |
| 18 NBN     | nibrin                                                 |
| 19 PIAS4   | protein inhibitor of activated STAT 4                  |
| 20 POLR2I  | RNA polymerase II subunit I                            |
| 21 PRKDC   | protein kinase, DNA-activated, catalytic subunit       |
| 22 RAD23B  | RAD23 homolog B, nucleotide excision repair protein    |
| 23 RAD51   | RAD51 recombinase                                      |
| 24 RBX1    | ring-box 1                                             |
| 25 RFC2    | replication factor C subunit 2                         |
| 26 RPA1    | replication protein A1                                 |
| 27 SIRT1   | sirtuin 1                                              |
| 28 SMC1A   | structural maintenance of chromosomes 1A               |
| 29 SUMO1   | small ubiquitin like modifier 1                        |
| 30 TP53BP1 | tumor protein p53 binding protein 1                    |
| 31 TRRAP   | transformation/transcription domain associated protein |
| 32 UBE2D3  | ubiquitin conjugating enzyme E2 D3                     |
| 33 UBE2N   | ubiquitin conjugating enzyme E2 N                      |
| 34 UBE2W   | ubiquitin conjugating enzyme E2 W                      |
| 35 UIMC1   | ubiquitin interaction motif containing 1               |
| 36 VCP     | valosin containing protein                             |
| 37 WDR48   | WD repeat domain 48                                    |
| 38 XRCC6   | X-ray repair cross complementing 6                     |
| 39 YY1     | YY1 transcription factor                               |

Table S7. Primers used for repeat, Chip-qPCR and Medip-qPCR analysis

| CNV             |                                         |                                         |     |
|-----------------|-----------------------------------------|-----------------------------------------|-----|
| LINE L1 ORF2-1  | TGCGGAGAAATAGGAACACTTTT                 | TGAGGAATCGCCACTGACT                     | [1] |
| LINE L1 ORF2-2  | CAAACCCGCATATCTCACTCA                   | CTTCTGTGCCATGTGATCTCA                   | [1] |
| SAT2            | CATCGAATGGAAATGAAAGGAGTC                | ACCATTGGATGATTGCAGTCAA                  | [2] |
| SATA            | CTGCACTACCTGAAGAGGAC                    | GATGGTTCAACTCTTACA                      | [2] |
| ALU             | CCAGAAAAATTACCAATTAGTTC                 | GGGCCTATTGACTATGCTTAC                   | [3] |
| Telomere length | CGGTTTGGTTGGGTTTGGGTTTGGGTTTGGGTTTGGGTT | GGCTTCCCTTACCCTTACCCTTACCCTTACCCTTACCCT |     |
| RPLP0           | CAGCAAGTGGGAAGGTGTAATCC                 | CCCATTCTATCATCAACGGGTACAA               |     |
| DNA methylation |                                         |                                         |     |
| ARID2           | GGCCGAAATACACGCTGTCA                    | CGATGGTGAAGGGTCTGGG                     | *   |
| ATM             | CTGCGTGGCTAACGGAGAAA                    | TACCACTGCACCTCGGAAGGT                   | *   |
| EGFR            | GCCCAGACCGGACGACA                       | ATACTGGACGAGTCAGGGG                     | *   |
| ESR2            | CAGTGTGGACGCTACGAG                      | GATTTTGTACCCGCACGTC                     | *   |
| ESRRA           | GCAACTTCCAAAGGTGTGC                     | AGCCTGCAGGTCCACTTTA                     | *   |
| H19             | CTCCTTGTCTGCCAATGTCC                    | GGAAAGACAGCAGTGTCTG                     | *   |
| H2AFX           | ACGGTGGCGCTGTCTTC                       | CCATCCGCAACGACGAGG                      | *   |
| IGF2            | TCGTCTGATTGTCCAGGGAGGA                  | CTGACCTCATTCCCAGTACCTTT                 | *   |
| KAT5            | GCGGAACCAAGGACAACGAA                    | GGGATTTCACTGACTCCCGC                    | *   |
| KCNQ1           | AACCACGATGACTGACGCAC                    | GCGATTCTGCCGGGGTG                       | *   |
| LINE1           | TCTGAGCCAGGTGTGGGATA                    | TCACTAGGAGTGCCAGACA                     | [4] |
| OGG1            | CCTACACCTCAGGAAAGCCG                    | GTGCTGTTTAAACACCTTCCCTG                 | *   |
| PGR             | TTATCTTTAGAGCGGGCGGC                    | GGAGTTCACCTGTGCTTC                      | *   |
| RPLP0           | CAGCAAGTGGGAAGGTGTAATCC                 | CCCATTCTATCATCAACGGGTACAA               | *   |
| SAT2            | CATCGAATGGAAATGAAAGGAGTC                | ACCATTGGATGATTGCAGTCAA                  | *   |
| SINEB1          | TGGTGGTGCATGCCTTTAAT                    | CCTGGTGTCTGGAACTCACT                    | [3] |
| SMG7            | GTGGACTTCACCACCGGGGA                    | AACCGATGTGTCGGACAGG                     | *   |
| SUV39H1         | AAAGTGAAGCAGTGGAGGC                     | CCTATCCTTCCGCGCC                        | *   |
| TERF2IP         | GACACCGGCTCGGAAGCAAA                    | ATGGCTACGTCTCCGCATC                     | *   |
| TERT            | CAGGGCCGCACGAA                          | CACCCCGCGATGCC                          | *   |
| UPF1            | TACGCCAGCTGGGTTTGTC                     | GACCAGGGCAGGTCAACCCTA                   | *   |
| UPF2            | CTGAGGAGAACGACGCCGGA                    | GCTCCAACGATCGGGAGGAA                    | *   |
| VEGFA           | CAGCTACCACCTCTCCCC                      | CAGCCAGAAGTTGGACGAA                     | *   |
| XRCC5           | GCCTGAGGACCGCAACAT                      | TTCCTGCTCCGAACCCCC                      | *   |
| ZBTB48          | GCCGCTCGGACCTGTG                        | ATGAGAGCGAACGGACTGGC                    | *   |
| ChIP            |                                         |                                         |     |
| STAT2           | TCAGGGCCCGTACCTGATTA                    | GGGGCGCGAGTTCTAGT                       | [4] |
| 5'UTR LINE      | GCCAAGATGGCCGAATAGG                     | AAATCACCCGTCTTCTGCGT                    | [6] |
| BRCA1           | TTCCCTCGGACCTACAAAC                     | CGTGGGAGAGTGGATTTCCG                    |     |
| ESR1            | ACTCAACAGCGTGTCTCCGA                    | GGGCTGTTCTCCAGGTAGT                     |     |
| KMT2E           | GGGGTCGAGCACATAACGG                     | ACACAAGTACCCCAACCCCG                    | [4] |
| RARA            | CGGGTAAAGTTTCAGCTCCG                    | GCGTCTGCCCTAACCCG                       |     |

\* used for DNA methylation and ChIP-qPCR analysis

- Coufal NG, Garcia-Perez JL, Peng GE, Yeo GW, Mu Y, Lovci MT, et al. L1 retrotransposition in human neural progenitor cells. *Nature*. 2009;460:1127–31.
- Alexiadis V, Ballestas ME, Sanchez C, Winokur S, Vedanarayanan V, Warren M, et al. RNAPol-ChIP analysis of transcription from FSHD-linked tandem repeats and satellite DNA. *Biochim Biophys Acta*. 2007;1769:29–40.
- Varshney D, Vavrova-Anderson J, Oler AJ, Cowling VH, Cairns BR, White RJ. SINE transcription by RNA polymerase III is suppressed by histone methylation but not by DNA methylation. *Nat Commun*. 2015;6:6569.
- Legoff L, D'Cruz SC, Bouchehkhouchka K, Monfort C, Jaulin C, Multigner L, et al. In utero exposure to chlordecone affects histone modifications and activates LINE-1 in cord blood. *Life Sci Alliance*. 2021;4:e202000944.
- Dessain SK, Yu H, Reddel RR, Beijersbergen RL, Weinberg RA. Methylation of the human telomerase gene CpG island. *Cancer Res*. 2000;60:537–41.
- De Cecco M, Ito T, Petrashen AP, Elias AE, Skvir NJ, Criscione SW, et al. L1 drives IFN in senescent cells and promotes age-associated inflammation. *Nature*. 2019;566:73–8.



Table S8. ChIP-seq reads

| Group | Sample name | BPA (microg/gram Creat) | number of reads |
|-------|-------------|-------------------------|-----------------|
| low   | FMSV217     | 2,55                    | 4,64E+07        |
| low   | FMSV218     | 1,12                    | 6,22E+07        |
| low   | FMSV219     | 2.13                    | 4,94E+07        |
| low   | FMSV220     | 2,43                    | 4,46E+07        |
| low   | FMSV221     | 0,66                    | 4,24E+07        |
| low   | FMSV222     | 1,10                    | 6,40E+07        |
| low   | FMSV223     | 0,73                    | 4,97E+07        |
| low   | FMSV224     | 2,31                    | 4,62E+07        |
| low   | FMSV225     | 2,35                    | 5,27E+07        |
| low   | FMSV226     | 1,28                    | 6,70E+07        |
| high  | FMSV167     | 19,57                   | 4,37E+07        |
| high  | FMSV170     | 17,11                   | 5,20E+07        |
| high  | FMSV173     | 10,55                   | 6,20E+07        |
| high  | FMSV175     | 39,34                   | 4,89E+07        |
| high  | FMSV177     | 42,64                   | 5,47E+07        |
| high  | FMSV233     | 10,07                   | 5,49E+07        |
| high  | FMSV234     | 12.24                   | 6,41E+07        |
| input | FMSV 178    | input                   | 6,38E+07        |

Table S9. Primers used for RT-qPCR in this work

|                | forward                   | reverse                   |
|----------------|---------------------------|---------------------------|
| <i>ARID2</i>   | GGAGCAGATCCAAGCACTGT      | TGGCATAGGAGTGTCTCGC       |
| <i>ATM</i>     | CCGAGTGCAGTGACAGTGAT      | CATGTTCTAGTTGACGGCAGCA    |
| <i>BRCA1</i>   | TCAGGAGGCCTTCAACCTC       | TTGATCAACTCCAGACAGATGGG   |
| <i>CDC45</i>   | ATAAGAGCCTGAAGGAGGGAGCC   | TCTTGGCTGTTGTCTCCCTGAGC   |
| <i>DNMT1</i>   | ACAGAAAAGGAATGTGTGAAGGAGA | CCAGGTAGCCCTCCTCGGAT      |
| <i>EGFR</i>    | ACACCTTCTCCCACTGCCT       | CCCCCTCTGGAGATGCTGGA      |
| <i>ESR1</i>    | CCCAGGGAAGCTACTGTTTGC     | TGATGTAGCCAGCAGCATGTC     |
| <i>ESR2</i>    | CAAACCAAAGCATCGGTCACG     | AGGCCATGATCCTGCTCAATTC    |
| <i>ESRRA</i>   | AGAGGACCATCCAGGGGAGC      | CTCCTGAGCATGCCACCC        |
| <i>EZH2</i>    | GACACCCGGTGGGACTCAGA      | AGTCTGGCCCATGATTATCTTCGT  |
| <i>FOS</i>     | CACTCCAAGCGGAGACAGAC      | GTGAGCTGCCAGGATGAA        |
| <i>HDAC1</i>   | CCTGGGTCGGACGCTGAG        | AATTTCCAACATCCCCGTCGT     |
| <i>HDAC2</i>   | GTCTGCTACTACTACGACGGTGATA | TTAACAGCAAGTTATGGGTCATGCG |
| <i>HDAC5</i>   | ACGAGTCGGCAGATGGGATG      | ACCGGCTTCACCTCCACTGT      |
| <i>HDAC6</i>   | AGTCGCGGGGAAAAGGTCG       | GGTGGAATCTGGCCGGTTG       |
| <i>IGF2</i>    | CTGGCAGAGGAGTGTCGGC       | GGGATTCCCATTTGGTGTCTGGAAG |
| <i>KAT5</i>    | GAGGTGGGTAGAGCCCGAGG      | GATCTCGGCCAGGGGCCA        |
| <i>KDM1A</i>   | AGCGAATCCCCAAGTGATGT      | AGAGAGTTGAGAGAGGTGTGGCA   |
| <i>KMT2E</i>   | GGTCGAGCACTGTGGCTG        | CTCATGACGTTCCGCTCTGG      |
| <i>NAPBL</i>   | GGCTGGCTTGGTGGGGTG        | CGGCCTGTCTCCAGACAAT       |
| <i>NUDT1</i>   | CCGACGACAGCTACTGGTTT      | CGCGGAGTGTGTAGTCCAG       |
| <i>OGG1</i>    | TTTCTGCGCTTTGCTGGTGG      | CTGTGGGGACCTTATGCTGG      |
| <i>PGR</i>     | GGCATGGTCCTTGGAGGTCG      | ATTTGGAACGCCCACTGGCT      |
| <i>POT1</i>    | GGCGGAGAACAAGCGACTAT      | ATCTGACAACCTGTGCCGT       |
| <i>RAD18</i>   | ATCCTCTTCTCTGTGTCAGTTCCA  | CTATCTTCTGTATGCATGGGACAGG |
| <i>RAD21</i>   | GCTTCATGGTCTTCAGCGTGC     | AGAACTTTGCGGCAGCTTGT      |
| <i>RPL37A</i>  | GAGACGAGCTGTGGGGATCT      | CTGATGGCGGACTTACCGT       |
| <i>SETDB1</i>  | TGGAAGACGGGAGAGGACAA      | GTTCTCAACCACTGCCTGT       |
| <i>SMG1</i>    | TGACTGGCAACCCAGAACTGA     | GCCGAGACACCACAGCTGAA      |
| <i>SMG7</i>    | GAGCCTGAGAGACCCACGGA      | GGACCCAGCTTAGAATCGGAGG    |
| <i>STAT2</i>   | CGTGACGGTTGCACAGAGT       | GGCACCTTTCTACTGCGCTT      |
| <i>TEN1</i>    | GACGCCTAGAACAGGAGCCC      | ATGTTCTCAGCGTGCTCCCA      |
| <i>TERF2IP</i> | GCGGATAGCGGGGAACCCAC      | CCTCAAACCTCCCGGTGGC       |
| <i>TERT</i>    | TGGGGTCTTCCAAACTTGCT      | GACGGTGTGACCAACATCT       |
| <i>TP53BP1</i> | TCGTGCCTCCATGGGAGTTCT     | AACTCTCTGCCCTACAGGTT      |
| <i>UPF1</i>    | AGGTCCTGATAATTATGGCGATG   | TGCGCTCTGCATCCTGTCAA      |
| <i>UPF2</i>    | CAACAGGCTCGAGATTGCTCT     | TTGGCCTCTCCTTGCTGCTC      |
| <i>VEGFA</i>   | GGTGCCCGCTGCTGTCTAAT      | CCTTGCAACGCGAGTCTGTG      |
| <i>XRCC5</i>   | ACCATGTTGTACAGCGACAGG     | CCCCACCAGAAAGGGGATTG      |
| <i>XRCC6</i>   | CGCTTCGCTCGTGAGCAGT       | AGTCTCCACTTGCTTCAAGTTCT   |
| <i>XRCC6</i>   | CGCTTCGCTCGTGAGCAGT       | AGTCTCCACTTGCTTCAAGTTCT   |
| <i>ZBTB48</i>  | CTGTGCGGGGGAGCTTT         | CCTTCTCCCGCTGCTGTTGA      |
